# Supplementary material for: Tissue-specific DNA methylation variability and its potential clinical value
Source: Frontiers journal article supplement (doi:10.3389/fgene.2023.1125967), 2023-07-19
Supplement: Data_Sheet_1.PDF [file Data_Sheet_1.PDF]

## Supplemental Figure 1

**Heteroscedasticity of beta values in a sperm donor sample. A)** Distribution of mean promoter methylation of the 100 most stable promoters in sperm which were found by calculating the variability value of the beta values of all probes in a promoter region. **B)** Distribution of mean promoter methylation of the 100 most stable promoters in sperm which were found by calculating the variability value of the m-values of all probes in a promoter region.

**A**

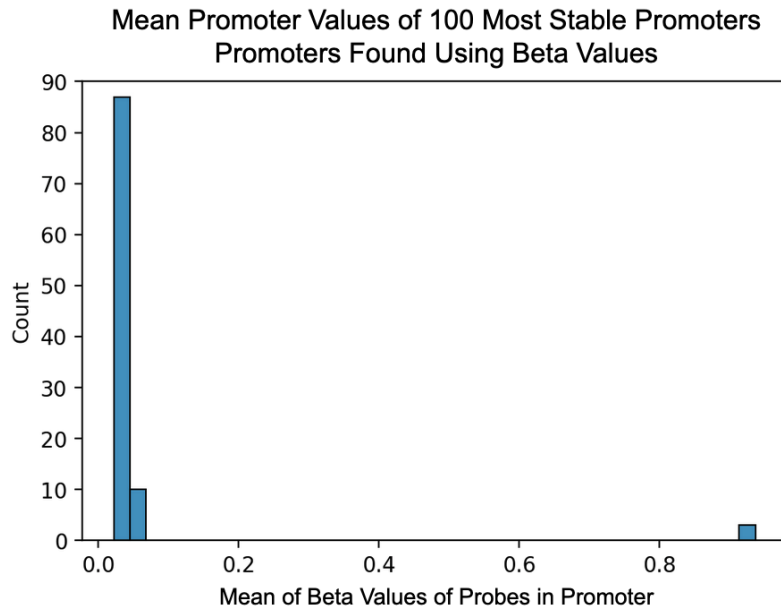

**B**

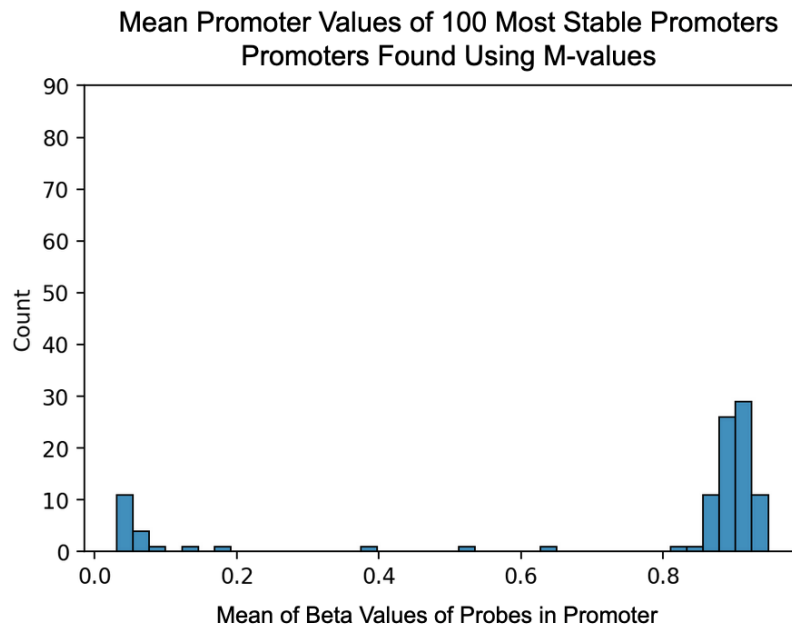

## Supplemental Figure 2

**Variability equations. A)** Equation for calculating the variability value (or standard deviation) of a given promoter in a sample;  $\sigma$  = gene promoter variability value,  $x_1$  = m-value of a given methylation array probe in a given promoter,  $\mu$  = mean of probe m-values in given promoter. **B)** Equation to calculate the promoter variability threshold for a given tissue.  $\theta$  = promoter variability threshold for a given tissue,  $\sigma_1$  = promoter variability value of a sample in a given cohort at a given promoter,  $\mu$  = mean of the promoter variability values at a given promoter in a given cohort.

**A**

$$\sigma = \sqrt{\frac{\sum |x_1 - \mu|^2}{N}}$$

**B**

$$\theta = \frac{\sum \sigma_1}{N} + 3\sqrt{\frac{\sum |\sigma_1 - \mu|^2}{N}}$$

### Supplemental Figure 3

**Hierarchical clustering of different control tissues using beta values.** This plot was created by performing hierarchical clustering on all promoter mean values of the beta values of probes in a given promoter.

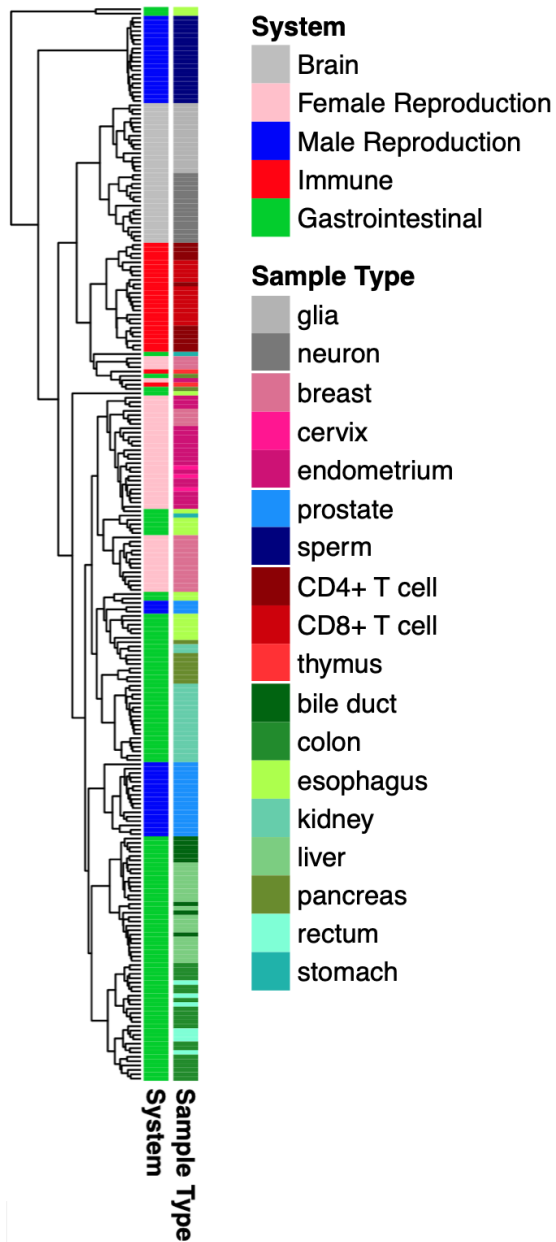

## Supplemental Figure 4

**Average promoter variability at tissue-specific promoters.** **A)** Average promoter variability values of numerous samples across several tissues at the most stable promoters in control lung tissue. **B)** Average promoter variability values of numerous samples across several tissues at the most stable promoters in control skin tissue. **C)** Average promoter variability values of numerous samples across several tissues at the most stable promoters in control liver tissue.

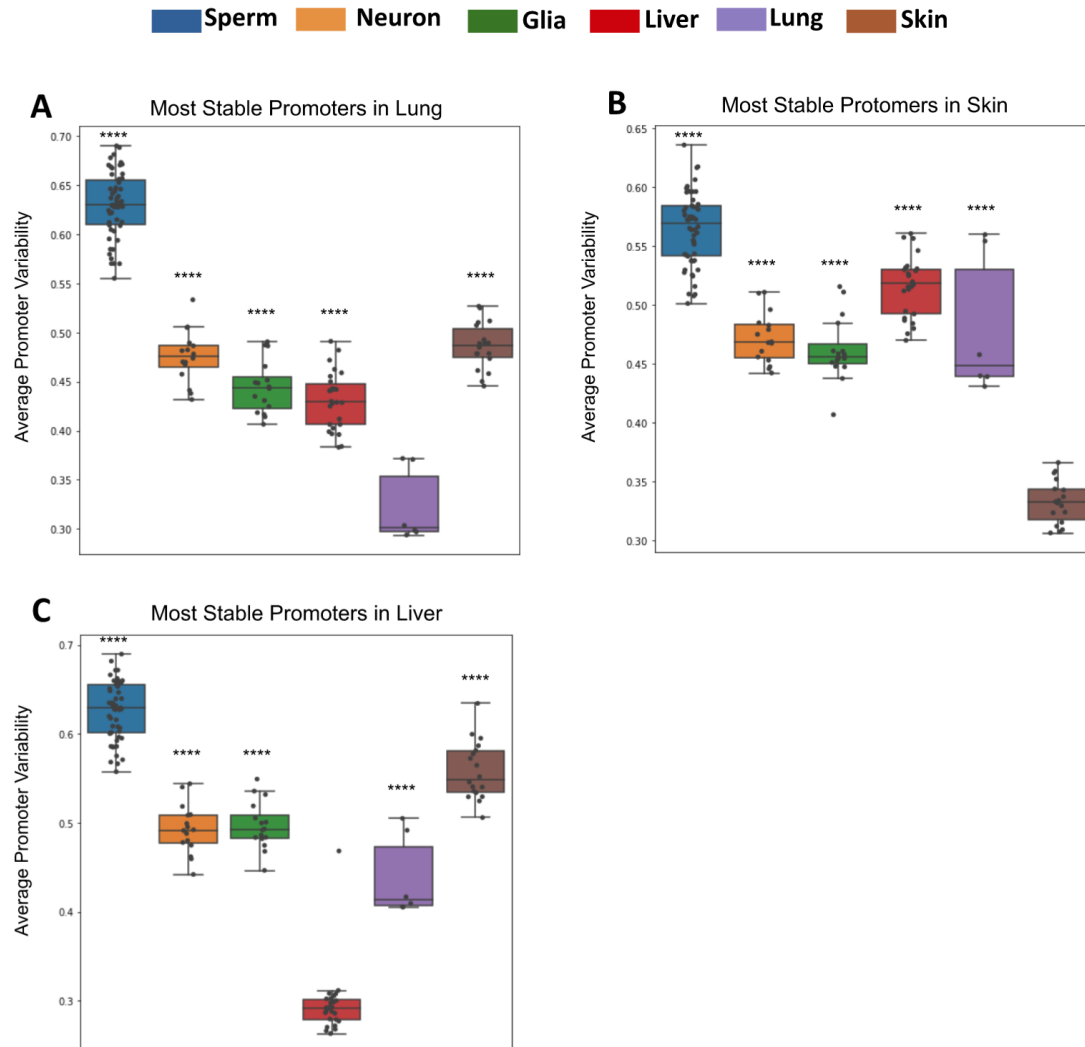

## Supplemental Figure 5

**Example of promoters with low methylation variability but varying levels of methylation.**

**A)** Box plot of methylation values of 31 sperm donor samples at 3 gene promoters with low methylation variability. **B)** Dot plot of methylation values of 1 sperm donor sample at 3 gene promoters with low methylation variability.

**A**

Promoters with low variability but differing methylation values  
Sperm donor samples (n=54)

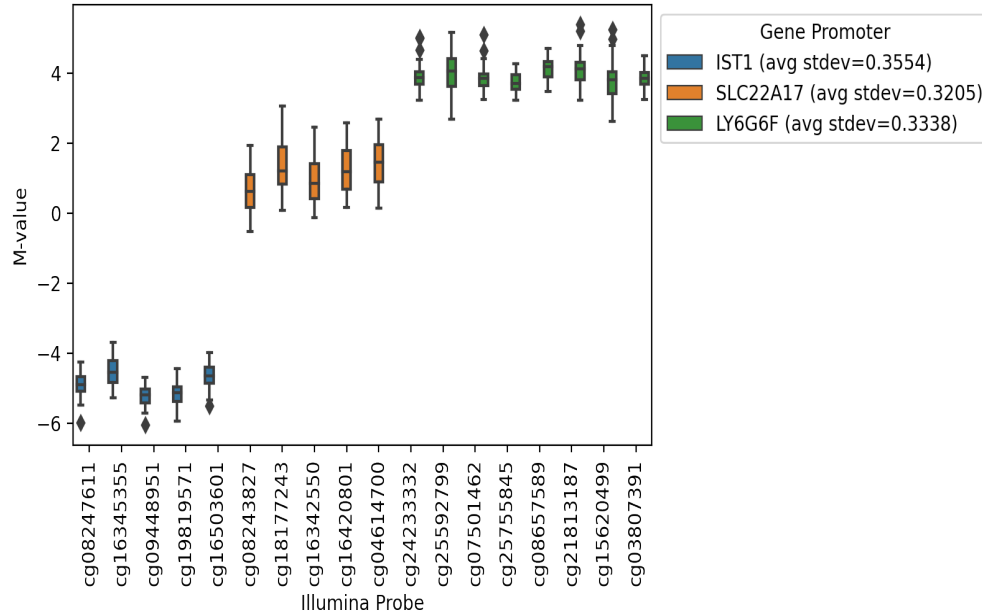

**B**

Promoters with low variability but differing methylation values  
Sperm donor sample (n=1)

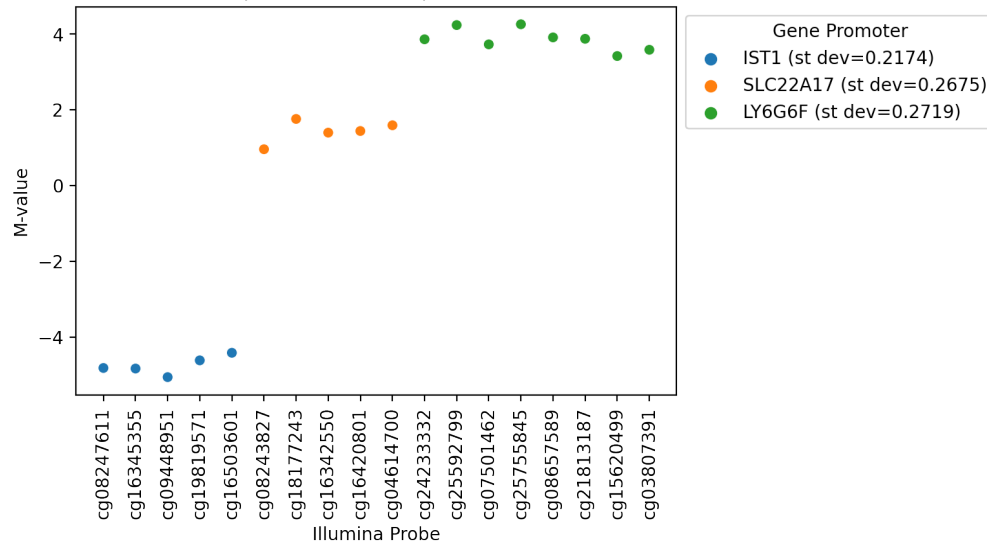

## Supplemental Figure 6

**Relationship of promoter CpG density to promoter methylation values (hypo, hypermethylation) and promoter methylation variability in healthy tissues.** In these plots, the promoter methylation mean values refer to the average of the mean beta values of methylation array probes in the most stable promoters in the given tissue types (top 10<sup>th</sup> percentile of promoters with lowest variability). The promoter methylation variability values refer to the average of the variability values (standard deviation) of methylation array probes in the most stable promoters in the given tissue types (top 10<sup>th</sup> percentile of promoters with lowest variability).

**A)** Relationship between promoter CpG density and promoter methylation values of sperm-specific promoters in sperm samples. **B)** Relationship between promoter CpG density and promoter methylation values of neuron-specific promoters in neuron samples. **C)** Relationship between promoter CpG density and promoter methylation variability values of sperm-specific promoters in sperm samples. **D)** Relationship between promoter CpG density and promoter methylation variability values of neuron-specific promoters in neuron samples.

**A)**  $R^2=0.5495$ ;  $p\text{-value}=3.0186 \times 10^{-181}$

**B)**  $R^2=0.4664$ ;  $p\text{-value}=3.3053 \times 10^{-143}$

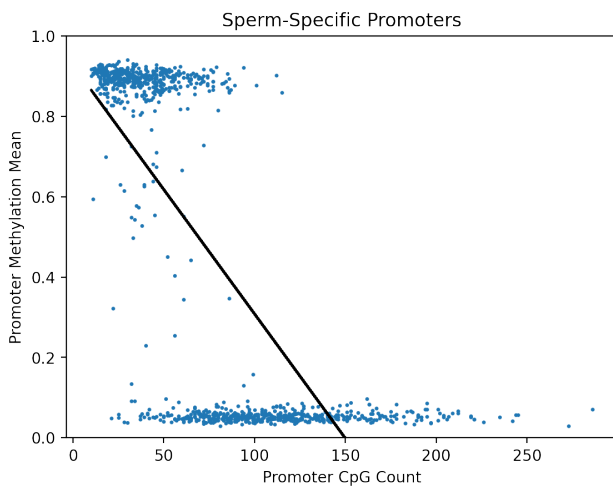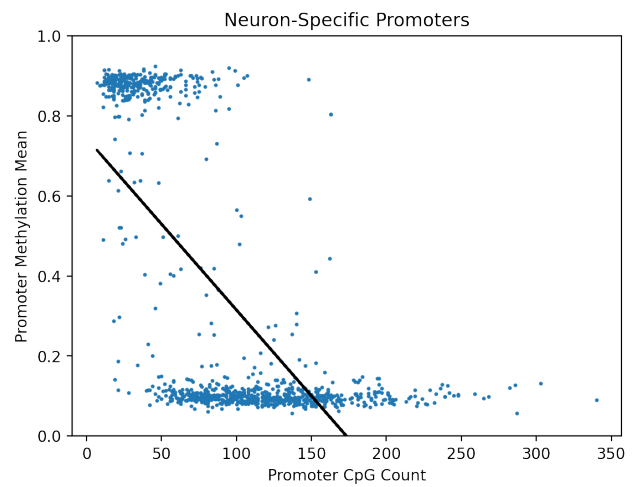

**C)**  $R^2=0.1093$ ;  $p\text{-value}=7.4370 \times 10^{-28}$

**D)**  $R^2=0.0977$ ;  $p\text{-value}=6.6063 \times 10^{-25}$

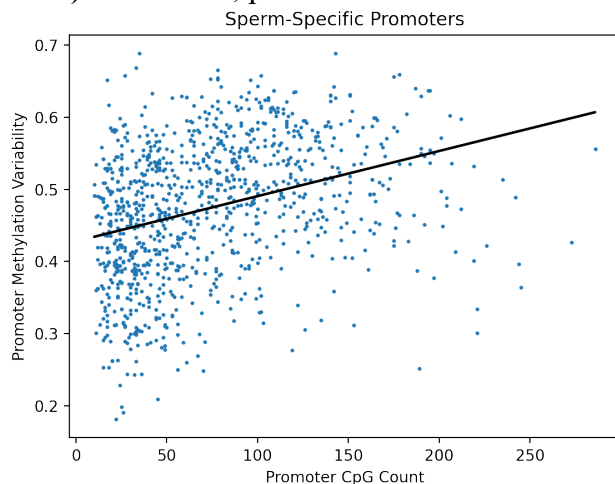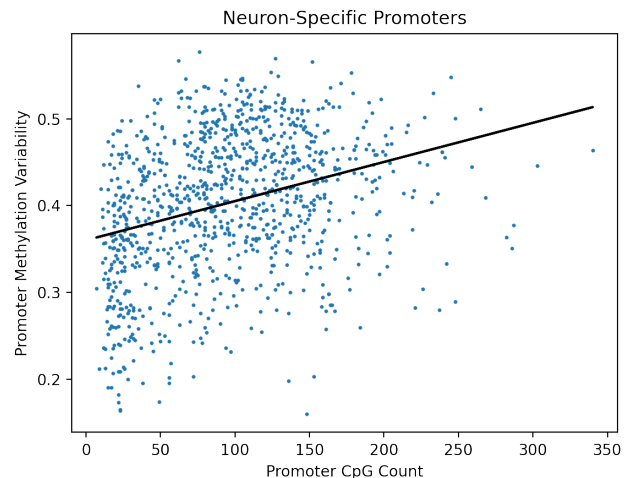

### Supplemental Figure 7

**Principal component analysis of diseased and control samples.** This plot shows the principal component analysis of liver samples from healthy individuals and those with nonalcoholic fatty liver disease (NAFLD) and nonalcoholic steatohepatitis (NASH).

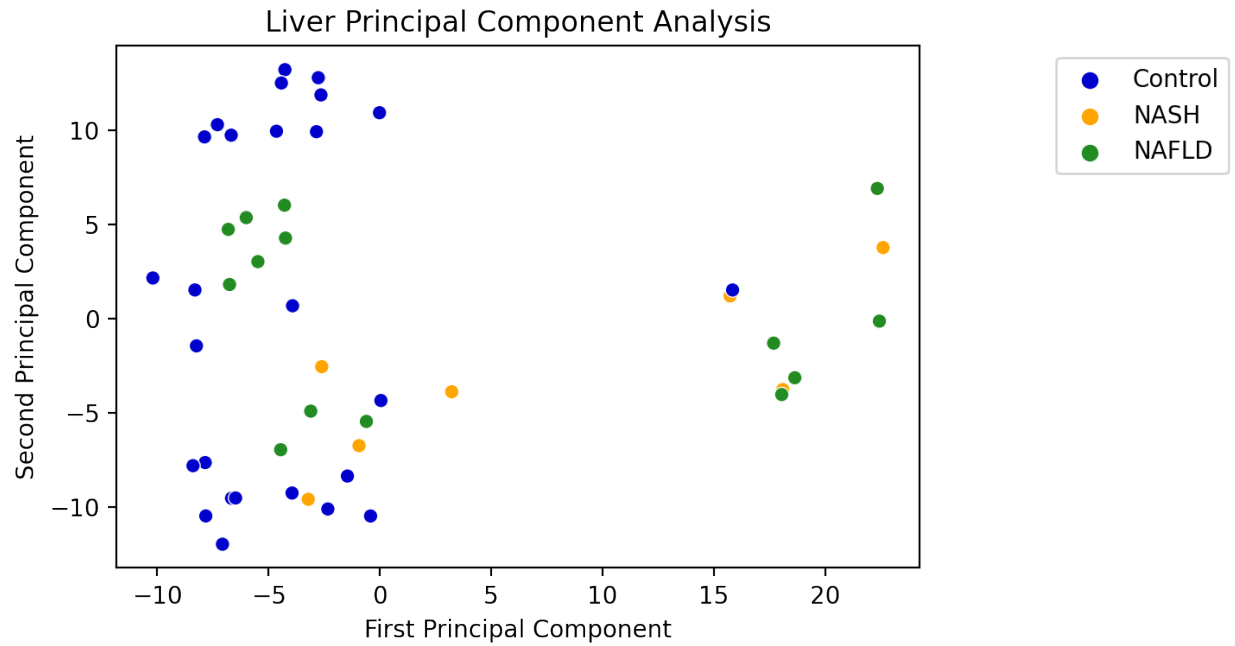

## Supplemental Figure 8

**Hierarchical clustering of diseased and control tissue samples.** This plot shows the hierarchical clustering of diseased and control tissue samples. Clustering is based on the variability values of all promoters. **A)** Hierarchical clustering of colon primary tumor samples and normal colon tissue samples. **B)** Hierarchical clustering of paired psoriatic skin lesion samples and normal skin samples. **C)** Hierarchical clustering of control, nonalcoholic fatty liver disease (NAFLD), and nonalcoholic steatohepatitis (NASH) liver samples.

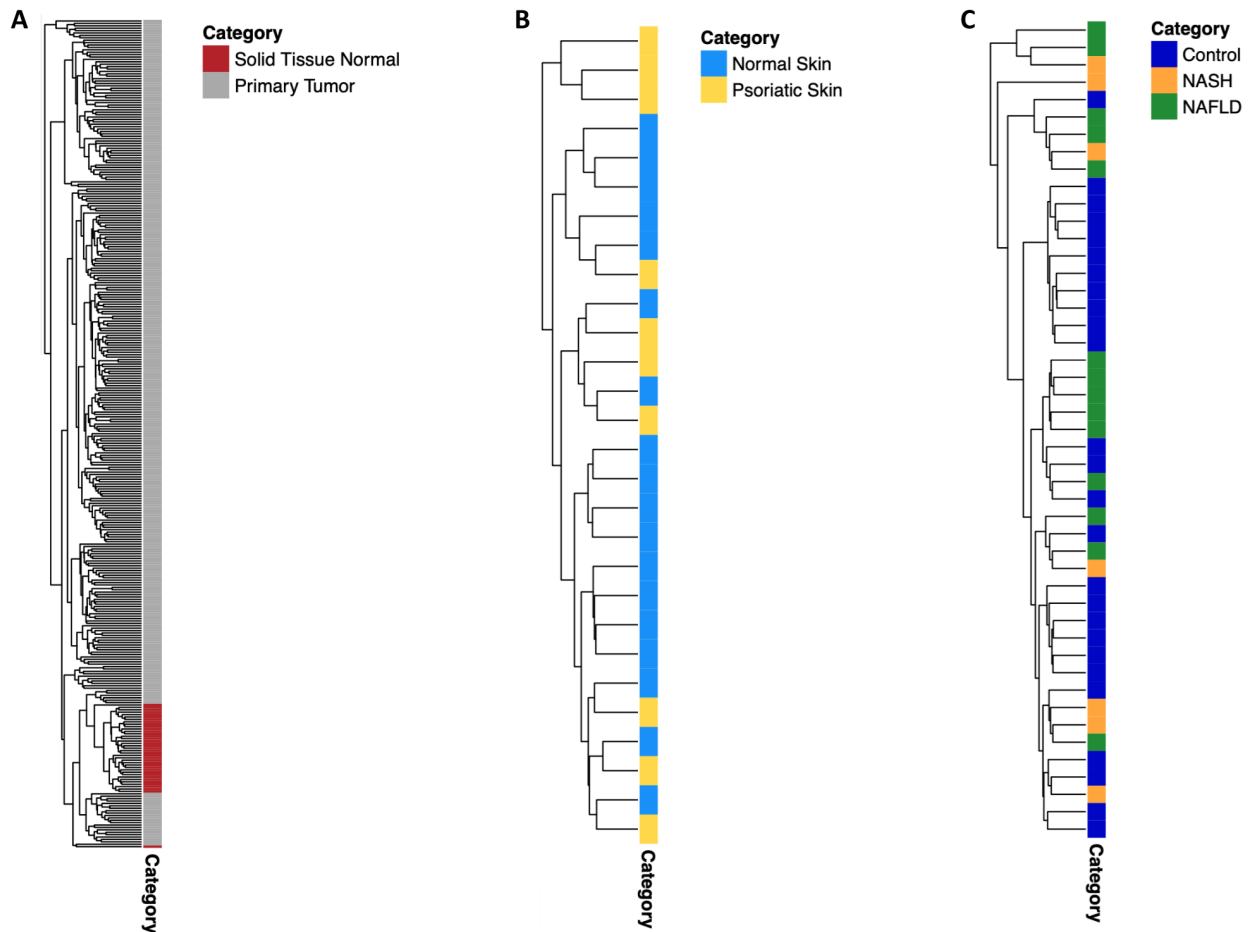



## Supplemental Figure 9

**Dysregulated promoter analysis of sperm samples from multiple cohorts.** These plots look at the number of dysregulated promoters from the most stable promoters in sperm. The “Sperm donor cohort (training)” is the cohort used to find the most stable promoters in sperm and set the promoter variability thresholds. Panel A shows the number of dysregulated promoters in various sperm sample cohorts on a linear scale and Panel B shows the same plot but on a logarithmic scale.

**A**

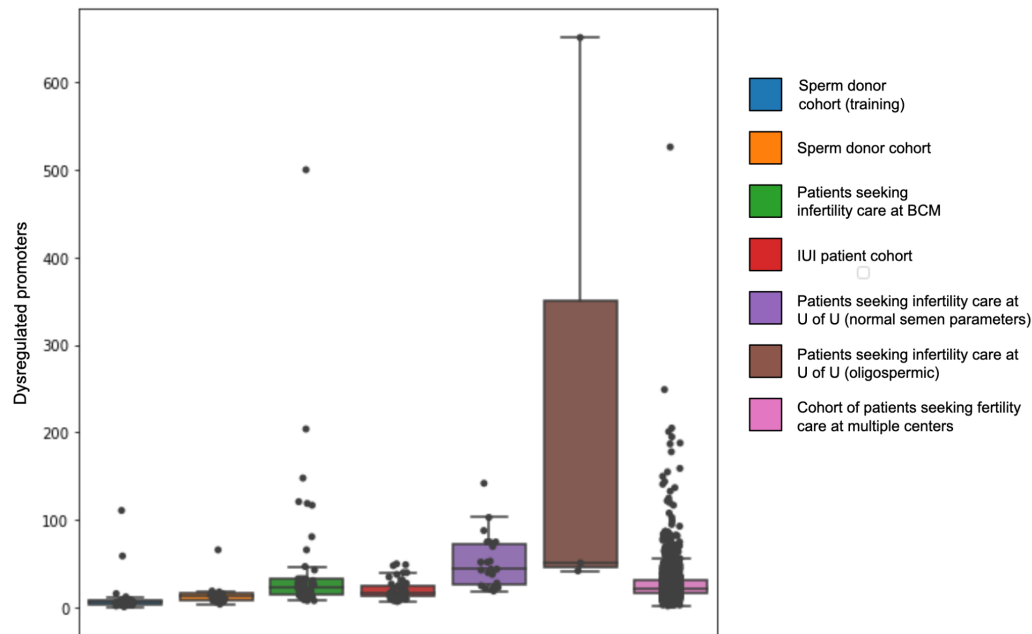

**B**

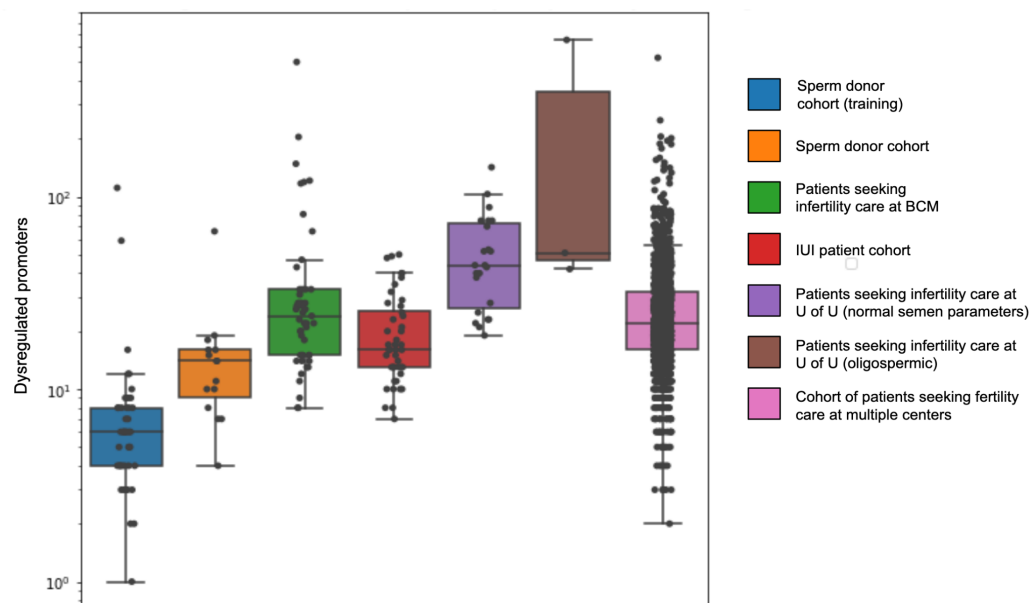

## Supplemental Figure 10

### Methylation levels of SNORD115

This plot shows the methylation levels (mean of beta values) of the differentially methylated region in sperm of SNORD115 (chr15:25425615-25494878, GRCh37) in a cohort of fertile sperm donors and men from couples failing to conceive with IUI. The dashed red line represents two standard deviations above the mean of the average methylation value of this DMR in the fertile donor cohort.

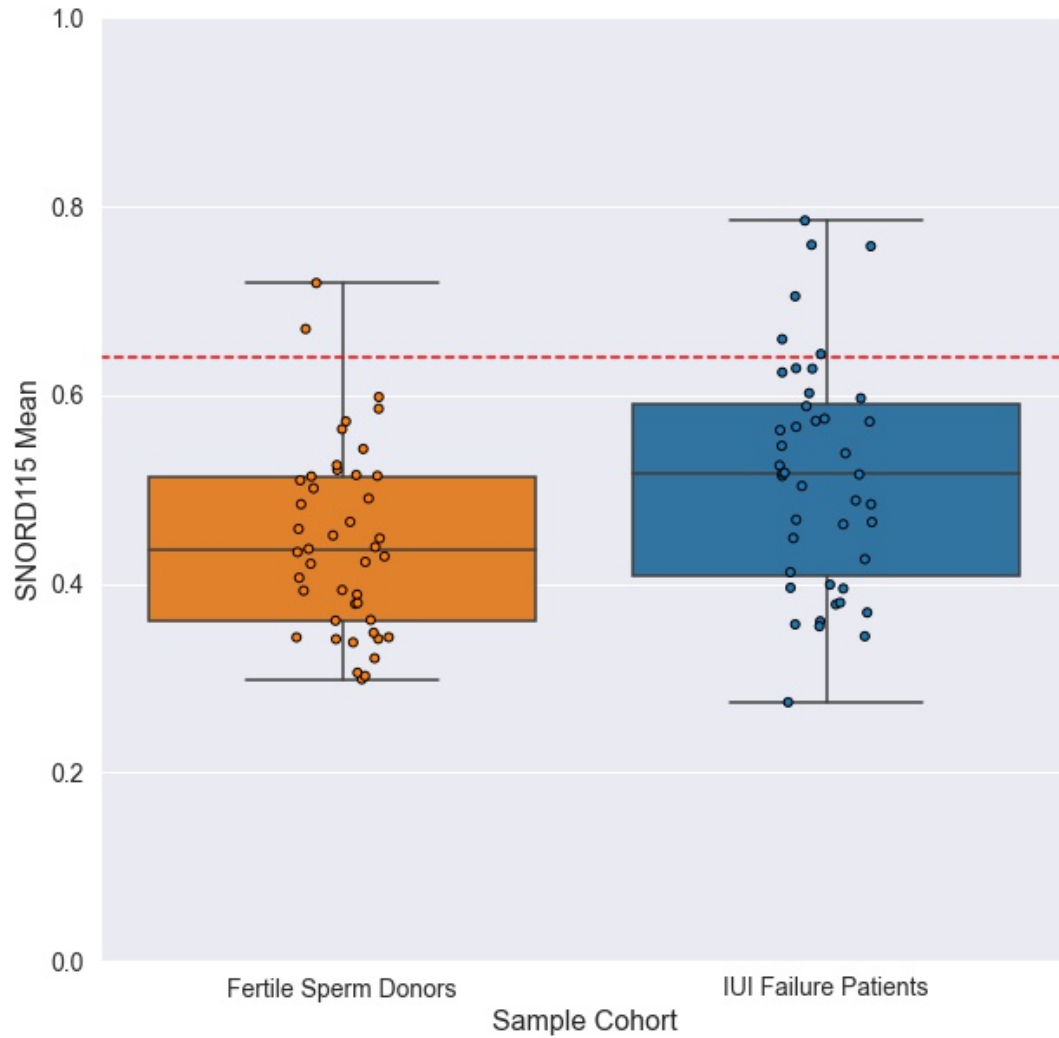

### Supplemental Figure 11

#### Methylation levels of SNORD115 and pregnancy from IUI

This plot shows the methylation levels (mean of beta values) of the differentially methylated region in sperm of SNORD115 (chr15:25425615-25494878, GRCh37) in males from couples receiving IUI (N=528) and the result of the IUI procedures in producing a pregnancy. These men are separate from the patients shown in Supplemental Figure 10. The dashed red line represents the DMR cutoff established in Supplemental Figure 10.

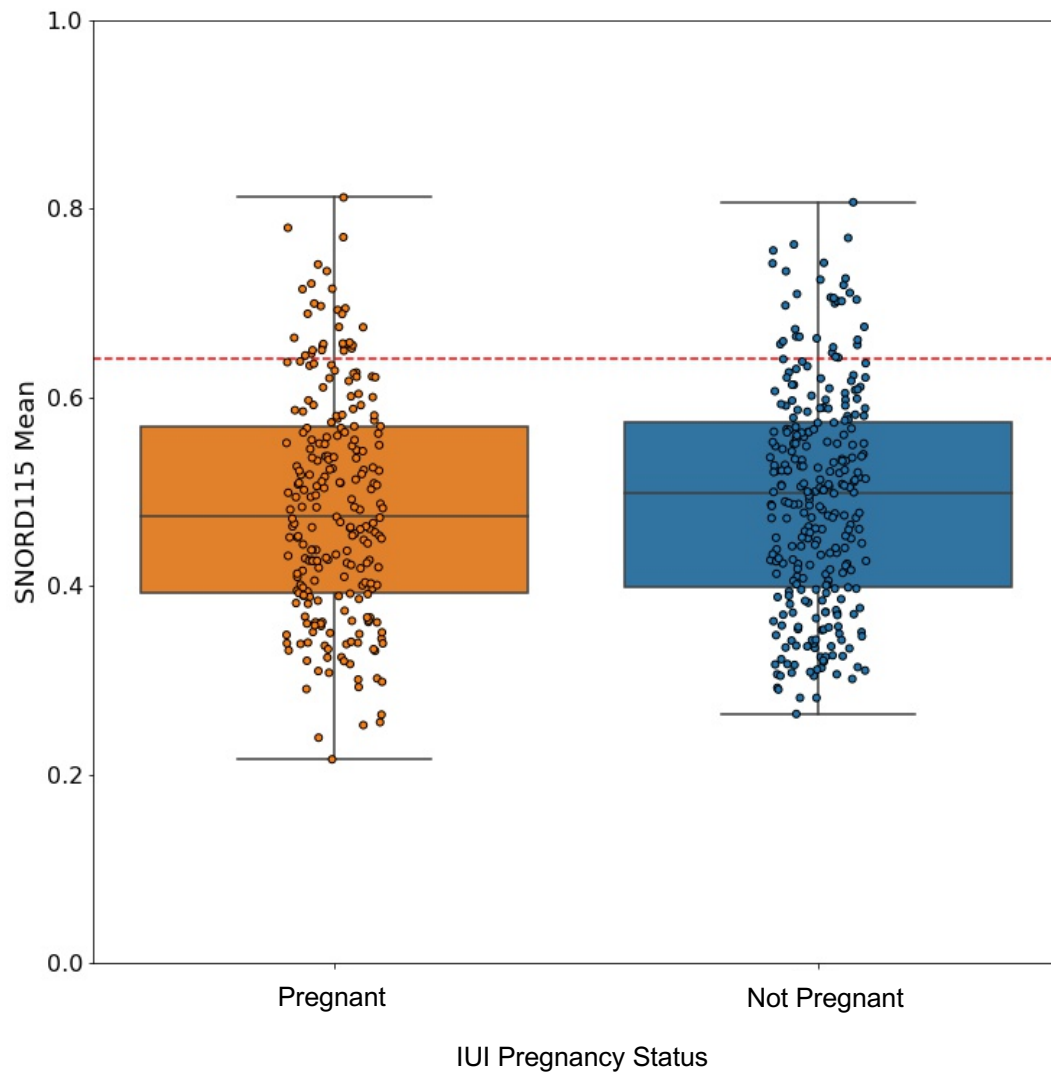

## Supplemental Figure 12

### Methylation levels of SNORD115 and live birth from IUI

This plot shows the methylation levels (mean of beta values) of the differentially methylated region in sperm of SNORD115 (chr15:25425615-25494878, GRCh37) in males from couples receiving IUI (N=528) and the result of the IUI procedures in producing a live birth. These men are separate from the patients shown in Supplemental Figure 10. The dashed red line represents the DMR cutoff established in Supplemental Figure 10.

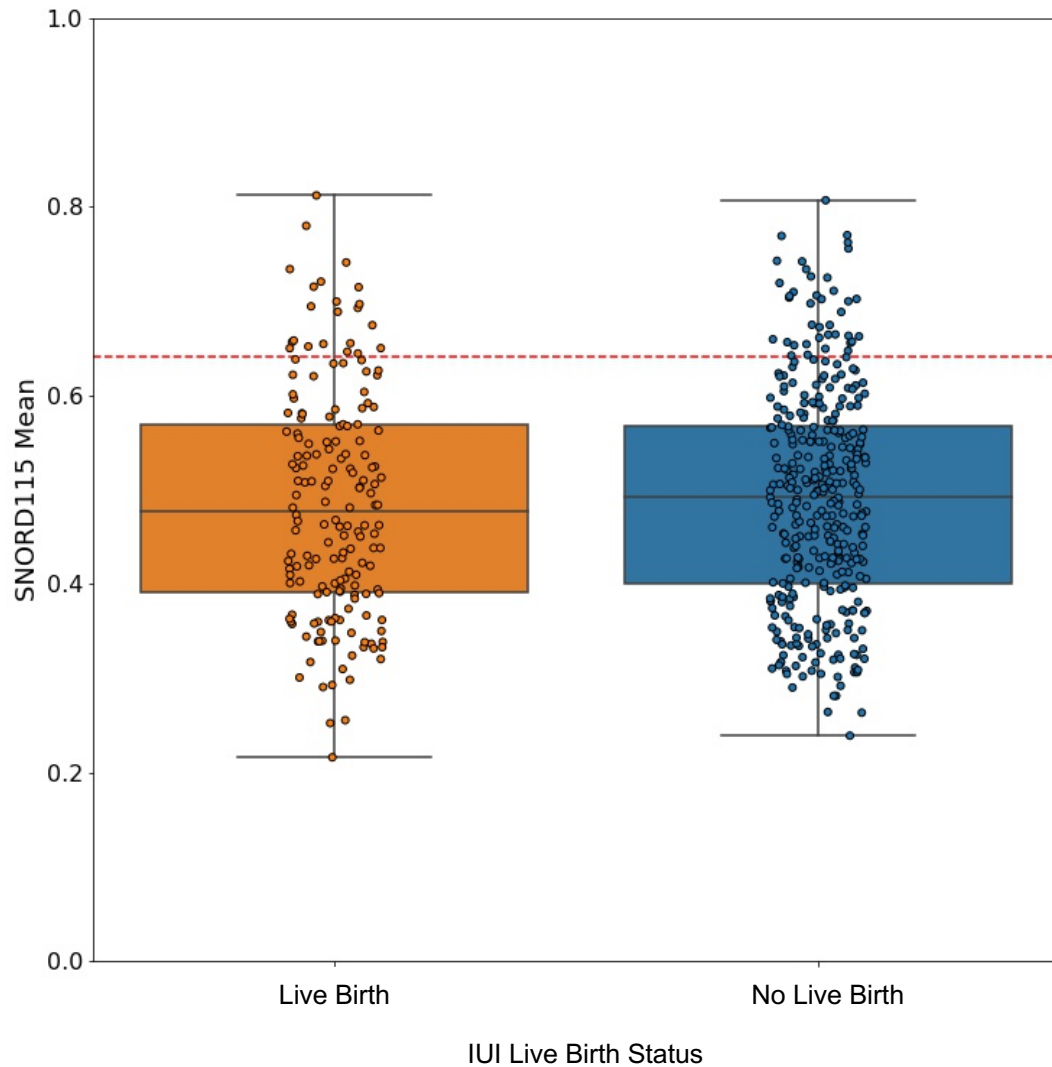

**Supplemental Table 1****Promoter CpG density of genes analyzed in Figures 2D and 2E**

| <b>Promoter</b> | <b>Promoter CpG Count</b> | <b>Gene Group</b>              |
|-----------------|---------------------------|--------------------------------|
| PRM1            | 37                        | Sperm specific protamine gene  |
| PRM2            | 55                        | Sperm specific protamine gene  |
| PRM3            | 52                        | Sperm specific protamine gene  |
| CASP8           | 29                        | Neuron specific apoptosis gene |

**Supplemental Table 2. IUI success rates from male partners with normal sperm concentration values ( $\geq 15$  million sperm / mL).**

| <b>Patient Cohort</b>                                                                                      | <b>Pregnancy Rate from IUI</b> | <b>Live Birth Rate from IUI</b> |
|------------------------------------------------------------------------------------------------------------|--------------------------------|---------------------------------|
| <b>Male partners with among least number of dysregulated promoters (bottom 10<sup>th</sup> percentile)</b> | 47.1%                          | 39.2%                           |
| <b>Male partners with among greatest number of dysregulated promoters (top 10<sup>th</sup> percentile)</b> | 30.2%                          | 18.6%                           |
| <b>P-Value</b>                                                                                             | 0.098                          | 0.030                           |

**Supplemental Table 3. Statistics of men seeking fertility care (N=1287) with the least and greatest number of dysregulated promoters.**

| <b>Patient Cohort</b>                                                                                      | <b>Mean Age (Years)</b> | <b>Median Age (Years)</b> | <b>Mean Sperm Conc (M/mL)</b> | <b>Median Sperm Conc (M/mL)</b> | <b>Mean BMI</b> | <b>Median BMI</b> |
|------------------------------------------------------------------------------------------------------------|-------------------------|---------------------------|-------------------------------|---------------------------------|-----------------|-------------------|
| <b>Male partners with among least number of dysregulated promoters (bottom 10<sup>th</sup> percentile)</b> | 33.3                    | 33.5                      | 87.4                          | 74.5                            | 29.7            | 28.7              |
| <b>Male partners with among greatest number of dysregulated promoters (top 10<sup>th</sup> percentile)</b> | 33.5                    | 32.0                      | 86.3                          | 58.5                            | 29.2            | 28.0              |
| <b>P-Value</b>                                                                                             | 0.705                   |                           | 0.909                         |                                 | 0.507           |                   |

**Supplemental Table 4. Ranking by sperm concentration.**

| <b>Concentration Level</b>                                                                         | <b>Pregnancy Rate from IUI</b> | <b>Live Birth Rate from IUI</b> |
|----------------------------------------------------------------------------------------------------|--------------------------------|---------------------------------|
| <b>Male partners with among the highest sperm concentration (top 10<sup>th</sup> percentile)</b>   | 32.1%                          | 23.2%                           |
| <b>Male partners with among the lowest sperm concentration (bottom 10<sup>th</sup> percentile)</b> | 28.6%                          | 23.8%                           |
| <b>P-Value</b>                                                                                     | 0.285                          | 0.587                           |

**Supplemental Table 5a. IUI pregnancy and sperm metrics.**

|                           | <b>Concentration<br/>(M/mL) Mean</b> | <b>Total Motile<br/>Count Mean</b> | <b>Morphology<br/>Mean</b> |
|---------------------------|--------------------------------------|------------------------------------|----------------------------|
| <b>IUI (pregnancy)</b>    | 106.11                               | 249.49                             | 6.73                       |
| <b>IUI (no pregnancy)</b> | 96.37                                | 215.99                             | 5.97                       |
| <b>P-value</b>            | 0.234                                | 0.140                              | 0.060                      |

**Supplemental Table 5b. IVF pregnancy and sperm metrics.**

|                           | <b>Concentration<br/>(M/mL) Mean</b> | <b>Total Motile<br/>Count Mean</b> | <b>Morphology<br/>Mean</b> |
|---------------------------|--------------------------------------|------------------------------------|----------------------------|
| <b>IVF (pregnancy)</b>    | 85.26                                | 185.43                             | 5.87                       |
| <b>IVF (no pregnancy)</b> | 89.26                                | 185.16                             | 6.94                       |
| <b>P-value</b>            | 0.770                                | 0.994                              | 0.200                      |

**Supplemental Table 5c. IUI live birth and sperm metrics.**

|                            | <b>Concentration<br/>(M/mL) Mean</b> | <b>Total Motile<br/>Count Mean</b> | <b>Morphology<br/>Mean</b> |
|----------------------------|--------------------------------------|------------------------------------|----------------------------|
| <b>IUI (live birth)</b>    | 106.16                               | 256.63                             | 6.41                       |
| <b>IUI (no live birth)</b> | 98.11                                | 218.53                             | 6.27                       |
| <b>P-value</b>             | 0.359                                | 0.112                              | 0.743                      |

**Supplemental Table 5d. IVF live birth and sperm metrics.**

|                            | <b>Concentration<br/>(M/mL) Mean</b> | <b>Total Motile<br/>Count Mean</b> | <b>Morphology<br/>Mean</b> |
|----------------------------|--------------------------------------|------------------------------------|----------------------------|
| <b>IVF (live birth)</b>    | 82.34                                | 185.13                             | 6.15                       |
| <b>IVF (no live birth)</b> | 91.95                                | 185.75                             | 5.98                       |
| <b>P-value</b>             | 0.395                                | 0.982                              | 0.805                      |

P-values in Supplemental Tables 5a-5d were calculated using two-sided, independent t-tests

**Supplemental Table 6a. IUI pregnancy and health measurements.**

|                               | <b>Male<br/>Age<br/>Mean</b> | <b>Male<br/>BMI<br/>Mean</b> | <b>Male<br/>Systolic<br/>Blood<br/>Pressure<br/>Mean</b> | <b>Male<br/>Diastolic<br/>Blood<br/>Pressure<br/>Mean</b> | <b>Female<br/>Age<br/>Mean</b> | <b>Female<br/>BMI<br/>Mean</b> | <b>Female<br/>Systolic<br/>Blood<br/>Pressure<br/>Mean</b> | <b>Female<br/>Diastolic<br/>Blood<br/>Pressure<br/>Mean</b> |
|-------------------------------|------------------------------|------------------------------|----------------------------------------------------------|-----------------------------------------------------------|--------------------------------|--------------------------------|------------------------------------------------------------|-------------------------------------------------------------|
| <b>IUI<br/>(pregnancy)</b>    | 32.21                        | 29.02                        | 125.77                                                   | 77.98                                                     | 30.63                          | 27.61                          | 114.68                                                     | 72.72                                                       |
| <b>IUI (no<br/>pregnancy)</b> | 32.91                        | 29.87                        | 126.54                                                   | 78.09                                                     | 31.19                          | 28.39                          | 114.56                                                     | 74.07                                                       |
| <b>P-value</b>                | 0.125                        | 0.127                        | 0.497                                                    | 0.910                                                     | 0.189                          | 0.269                          | 0.921                                                      | 0.143                                                       |

**Supplemental Table 6b. IVF pregnancy and health measurements.**

|                               | <b>Male<br/>Age<br/>Mean</b> | <b>Male<br/>BMI<br/>Mean</b> | <b>Male<br/>Systolic<br/>Blood<br/>Pressure<br/>Mean</b> | <b>Male<br/>Diastolic<br/>Blood<br/>Pressure<br/>Mean</b> | <b>Female<br/>Age<br/>Mean</b> | <b>Female<br/>BMI<br/>Mean</b> | <b>Female<br/>Systolic<br/>Blood<br/>Pressure<br/>Mean</b> | <b>Female<br/>Diastolic<br/>Blood<br/>Pressure<br/>Mean</b> |
|-------------------------------|------------------------------|------------------------------|----------------------------------------------------------|-----------------------------------------------------------|--------------------------------|--------------------------------|------------------------------------------------------------|-------------------------------------------------------------|
| <b>IVF<br/>(pregnancy)</b>    | 34.37                        | 28.51                        | 126.40                                                   | 77.94                                                     | 32.11                          | 25.74                          | 112.96                                                     | 70.53                                                       |
| <b>IVF (no<br/>pregnancy)</b> | 36.45                        | 28.70                        | 127.17                                                   | 78.71                                                     | 35.49                          | 27.50                          | 113.47                                                     | 70.61                                                       |
| <b>P-value</b>                | 0.029                        | 0.828                        | 0.683                                                    | 0.623                                                     | 2.70x10 <sup>-6</sup>          | 0.094                          | 0.810                                                      | 0.956                                                       |

**Supplemental Table 6c. IUI live birth and health measurements.**

|                                | <b>Male<br/>Age<br/>Mean</b> | <b>Male<br/>BMI<br/>Mean</b> | <b>Male<br/>Systolic<br/>Blood<br/>Pressure<br/>Mean</b> | <b>Male<br/>Diastolic<br/>Blood<br/>Pressure<br/>Mean</b> | <b>Female<br/>Age<br/>Mean</b> | <b>Female<br/>BMI<br/>Mean</b> | <b>Female<br/>Systolic<br/>Blood<br/>Pressure<br/>Mean</b> | <b>Female<br/>Diastolic<br/>Blood<br/>Pressure<br/>Mean</b> |
|--------------------------------|------------------------------|------------------------------|----------------------------------------------------------|-----------------------------------------------------------|--------------------------------|--------------------------------|------------------------------------------------------------|-------------------------------------------------------------|
| <b>IUI<br/>(live birth)</b>    | 31.80                        | 28.67                        | 125.65                                                   | 77.82                                                     | 30.44                          | 27.14                          | 114.67                                                     | 72.03                                                       |
| <b>IUI (no live<br/>birth)</b> | 32.98                        | 29.89                        | 126.45                                                   | 78.15                                                     | 31.18                          | 28.48                          | 114.59                                                     | 74.15                                                       |
| <b>P-value</b>                 | 0.015                        | 0.039                        | 0.505                                                    | 0.736                                                     | 0.097                          | 0.071                          | 0.953                                                      | 0.030                                                       |



**Supplemental Table 6d. IVF live birth and health measurements.**

|                                | <b>Male<br/>Age<br/>Mean</b> | <b>Male<br/>BMI<br/>Mean</b> | <b>Male<br/>Systolic<br/>Blood<br/>Pressure<br/>Mean</b> | <b>Male<br/>Diastolic<br/>Blood<br/>Pressure<br/>Mean</b> | <b>Female<br/>Age<br/>Mean</b> | <b>Female<br/>BMI<br/>Mean</b> | <b>Female<br/>Systolic<br/>Blood<br/>Pressure<br/>Mean</b> | <b>Female<br/>Diastolic<br/>Blood<br/>Pressure<br/>Mean</b> |
|--------------------------------|------------------------------|------------------------------|----------------------------------------------------------|-----------------------------------------------------------|--------------------------------|--------------------------------|------------------------------------------------------------|-------------------------------------------------------------|
| <b>IVF<br/>(live birth)</b>    | 34.52                        | 28.62                        | 126.66                                                   | 77.83                                                     | 32.36                          | 25.70                          | 113.15                                                     | 70.16                                                       |
| <b>IVF<br/>(no live birth)</b> | 35.24                        | 28.43                        | 126.40                                                   | 78.52                                                     | 33.52                          | 26.75                          | 112.93                                                     | 71.14                                                       |
| <b>P-value</b>                 | 0.369                        | 0.796                        | 0.867                                                    | 0.595                                                     | 0.058                          | 0.232                          | 0.905                                                      | 0.451                                                       |

P-values in Supplemental Tables 6a-6d were calculated using two-sided, independent t-tests

**Supplemental Table 7a. IUI pregnancy and male smoking frequency (last 3 months).**

| <b>Smoking Frequency</b>              | <b>IUI (pregnancy)</b> | <b>IUI (no pregnancy)</b> |
|---------------------------------------|------------------------|---------------------------|
| <b>Never</b>                          | 216                    | 259                       |
| <b>Rarely (1-4 times per month)</b>   | 12                     | 12                        |
| <b>Sometimes (2-6 times per week)</b> | 4                      | 2                         |
| <b>Daily</b>                          | 2                      | 9                         |
| <b>Chi-square Test Indep. P-value</b> | 0.205                  |                           |

**Supplemental Table 7b. IUI pregnancy and female smoking frequency (last 3 months).**

| <b>Smoking Frequency</b>              | <b>IUI (pregnancy)</b> | <b>IUI (no pregnancy)</b> |
|---------------------------------------|------------------------|---------------------------|
| <b>Never</b>                          | 227                    | 268                       |
| <b>Rarely (1-4 times per month)</b>   | 3                      | 5                         |
| <b>Sometimes (2-6 times per week)</b> | 0                      | 1                         |
| <b>Daily</b>                          | 2                      | 5                         |
| <b>Chi-square Test Indep. P-value</b> | 0.599                  |                           |

**Supplemental Table 7c. IVF pregnancy and male smoking frequency (last 3 months).**

| <b>Smoking Frequency</b>              | <b>IVF (pregnancy)</b>  | <b>IVF (no pregnancy)</b> |
|---------------------------------------|-------------------------|---------------------------|
| <b>Never</b>                          | 176                     | 46                        |
| <b>Rarely (1-4 times per month)</b>   | 2                       | 2                         |
| <b>Sometimes (2-6 times per week)</b> | 0                       | 0                         |
| <b>Daily</b>                          | 2                       | 2                         |
| <b>Chi-square Test Indep. P-value</b> | Too many missing values |                           |

**Supplemental Table 7d. IVF pregnancy and female smoking frequency (last 3 months).**

| <b>Smoking Frequency</b>              | <b>IVF (pregnancy)</b> | <b>IVF (no pregnancy)</b> |
|---------------------------------------|------------------------|---------------------------|
| <b>Never</b>                          | 172                    | 39                        |
| <b>Rarely (1-4 times per month)</b>   | 3                      | 6                         |
| <b>Sometimes (2-6 times per week)</b> | 3                      | 0                         |
| <b>Daily</b>                          | 1                      | 1                         |
| <b>Chi-square Test Indep. P-value</b> | 0.003                  |                           |

**Supplemental Table 8a. IUI live birth and male smoking frequency (last 3 months).**

| <b>Smoking Frequency</b>              | <b>IUI (live birth)</b> | <b>IUI (no live birth)</b> |
|---------------------------------------|-------------------------|----------------------------|
| <b>Never</b>                          | 156                     | 319                        |
| <b>Rarely (1-4 times per month)</b>   | 8                       | 16                         |
| <b>Sometimes (2-6 times per week)</b> | 3                       | 3                          |
| <b>Daily</b>                          | 2                       | 9                          |
| <b>Chi-square Test Indep. P-value</b> | 0.599                   |                            |

**Supplemental Table 8b. IUI live birth and female smoking frequency (last 3 months).**

| <b>Smoking Frequency</b>              | <b>IUI (live birth)</b> | <b>IUI (no live birth)</b> |
|---------------------------------------|-------------------------|----------------------------|
| <b>Never</b>                          | 165                     | 330                        |
| <b>Rarely (1-4 times per month)</b>   | 3                       | 5                          |
| <b>Sometimes (2-6 times per week)</b> | 0                       | 1                          |
| <b>Daily</b>                          | 2                       | 5                          |
| <b>Chi-square Test Indep. P-value</b> | 0.889                   |                            |

**Supplemental Table 8c. IVF live birth and male smoking frequency (last 3 months).**

| <b>Smoking Frequency</b>              | <b>IVF (live birth)</b> | <b>IVF (no live birth)</b> |
|---------------------------------------|-------------------------|----------------------------|
| <b>Never</b>                          | 136                     | 86                         |
| <b>Rarely (1-4 times per month)</b>   | 2                       | 2                          |
| <b>Sometimes (2-6 times per week)</b> | 0                       | 0                          |
| <b>Daily</b>                          | 2                       | 0                          |
| <b>Chi-square Test Indep. P-value</b> | Too many missing values |                            |

**Supplemental Table 8d. IVF live birth and female smoking frequency (last 3 months).**

| <b>Smoking Frequency</b>              | <b>IVF (live birth)</b> | <b>IVF (no live birth)</b> |
|---------------------------------------|-------------------------|----------------------------|
| <b>Never</b>                          | 131                     | 80                         |
| <b>Rarely (1-4 times per month)</b>   | 3                       | 6                          |
| <b>Sometimes (2-6 times per week)</b> | 2                       | 1                          |
| <b>Daily</b>                          | 1                       | 1                          |
| <b>Chi-square Test Indep. P-value</b> | 0.371                   |                            |

**Supplemental Table 9a. IUI pregnancy and male alcohol consumption (last 3 months).**

| <b>Smoking Frequency</b>              | <b>IUI (pregnancy)</b> | <b>IUI (no pregnancy)</b> |
|---------------------------------------|------------------------|---------------------------|
| <b>Never</b>                          | 123                    | 179                       |
| <b>Rarely (1-4 times per month)</b>   | 65                     | 61                        |
| <b>Sometimes (2-6 times per week)</b> | 42                     | 38                        |
| <b>Daily</b>                          | 4                      | 5                         |
| <b>Chi-square Test Indep. P-value</b> | 0.101                  |                           |

**Supplemental Table 9b. IUI pregnancy and female alcohol consumption (last 3 months).**

| <b>Smoking Frequency</b>              | <b>IUI (pregnancy)</b> | <b>IUI (no pregnancy)</b> |
|---------------------------------------|------------------------|---------------------------|
| <b>Never</b>                          | 146                    | 189                       |
| <b>Rarely (1-4 times per month)</b>   | 64                     | 66                        |
| <b>Sometimes (2-6 times per week)</b> | 22                     | 22                        |
| <b>Daily</b>                          | 0                      | 2                         |
| <b>Chi-square Test Indep. P-value</b> | 0.354                  |                           |

**Supplemental Table 9c. IVF pregnancy and male alcohol consumption (last 3 months).**

| <b>Smoking Frequency</b>              | <b>IVF (pregnancy)</b> | <b>IVF (no pregnancy)</b> |
|---------------------------------------|------------------------|---------------------------|
| <b>Never</b>                          | 80                     | 23                        |
| <b>Rarely (1-4 times per month)</b>   | 49                     | 13                        |
| <b>Sometimes (2-6 times per week)</b> | 44                     | 11                        |
| <b>Daily</b>                          | 7                      | 1                         |
| <b>Chi-square Test Indep. P-value</b> | 0.921                  |                           |

**Supplemental Table 9d. IVF pregnancy and female alcohol consumption (last 3 months).**

| <b>Smoking Frequency</b>              | <b>IVF (pregnancy)</b> | <b>IVF (no pregnancy)</b> |
|---------------------------------------|------------------------|---------------------------|
| <b>Never</b>                          | 87                     | 24                        |
| <b>Rarely (1-4 times per month)</b>   | 58                     | 13                        |
| <b>Sometimes (2-6 times per week)</b> | 33                     | 8                         |
| <b>Daily</b>                          | 1                      | 1                         |
| <b>Chi-square Test Indep. P-value</b> | 0.708                  |                           |

**Supplemental Table 10a. IUI live birth and male alcohol consumption (last 3 months).**

| <b>Smoking Frequency</b>              | <b>IUI (live birth)</b> | <b>IUI (no live birth)</b> |
|---------------------------------------|-------------------------|----------------------------|
| <b>Never</b>                          | 89                      | 213                        |
| <b>Rarely (1-4 times per month)</b>   | 49                      | 77                         |
| <b>Sometimes (2-6 times per week)</b> | 29                      | 51                         |
| <b>Daily</b>                          | 2                       | 7                          |
| <b>Chi-square Test Indep. P-value</b> | 0.209                   |                            |

**Supplemental Table 10b. IUI live birth and female alcohol consumption (last 3 months).**

| <b>Smoking Frequency</b>              | <b>IUI (live birth)</b> | <b>IUI (no live birth)</b> |
|---------------------------------------|-------------------------|----------------------------|
| <b>Never</b>                          | 110                     | 225                        |
| <b>Rarely (1-4 times per month)</b>   | 43                      | 87                         |
| <b>Sometimes (2-6 times per week)</b> | 17                      | 27                         |
| <b>Daily</b>                          | 0                       | 2                          |
| <b>Chi-square Test Indep. P-value</b> | 0.660                   |                            |

**Supplemental Table 10c. IVF live birth and male alcohol consumption (last 3 months).**

| <b>Smoking Frequency</b>              | <b>IVF (live birth)</b> | <b>IVF (no live birth)</b> |
|---------------------------------------|-------------------------|----------------------------|
| <b>Never</b>                          | 58                      | 45                         |
| <b>Rarely (1-4 times per month)</b>   | 39                      | 23                         |
| <b>Sometimes (2-6 times per week)</b> | 37                      | 18                         |
| <b>Daily</b>                          | 6                       | 2                          |
| <b>Chi-square Test Indep. P-value</b> | 0.456                   |                            |

**Supplemental Table 10d. IVF live birth and female alcohol consumption (last 3 months).**

| <b>Smoking Frequency</b>              | <b>IVF (live birth)</b> | <b>IVF (no live birth)</b> |
|---------------------------------------|-------------------------|----------------------------|
| <b>Never</b>                          | 61                      | 50                         |
| <b>Rarely (1-4 times per month)</b>   | 48                      | 23                         |
| <b>Sometimes (2-6 times per week)</b> | 28                      | 13                         |
| <b>Daily</b>                          | 0                       | 2                          |
| <b>Chi-square Test Indep. P-value</b> | 0.071                   |                            |

**Supplemental Table 11a. IUI pregnancy and male physical activity (last 3 months).**

| <b>Male Physical Activity</b>         | <b>IUI (pregnancy)</b> | <b>IUI (no pregnancy)</b> |
|---------------------------------------|------------------------|---------------------------|
| <b>Low</b>                            | 69                     | 102                       |
| <b>Moderate</b>                       | 83                     | 102                       |
| <b>High</b>                           | 81                     | 77                        |
| <b>Chi-square Test Indep. P-value</b> | 0.137                  |                           |

**Supplemental Table 11b. IVF pregnancy and male physical activity (last 3 months).**

| <b>Male Physical Activity</b>         | <b>IVF (pregnancy)</b> | <b>IVF (no pregnancy)</b> |
|---------------------------------------|------------------------|---------------------------|
| <b>Low</b>                            | 73                     | 15                        |
| <b>Moderate</b>                       | 60                     | 19                        |
| <b>High</b>                           | 44                     | 14                        |
| <b>Chi-square Test Indep. P-value</b> | 0.453                  |                           |

**Supplemental Table 11c. IUI live birth and male physical activity (last 3 months).**

| <b>Male Physical Activity</b>         | <b>IUI (live birth)</b> | <b>IUI (no live birth)</b> |
|---------------------------------------|-------------------------|----------------------------|
| <b>Low</b>                            | 53                      | 118                        |
| <b>Moderate</b>                       | 55                      | 130                        |
| <b>High</b>                           | 60                      | 98                         |
| <b>Chi-square Test Indep. P-value</b> | 0.227                   |                            |

**Supplemental Table 11d. IVF live birth and male physical activity (last 3 months).**

| <b>Male Physical Activity</b>         | <b>IVF (live birth)</b> | <b>IVF (no live birth)</b> |
|---------------------------------------|-------------------------|----------------------------|
| <b>Low</b>                            | 56                      | 32                         |
| <b>Moderate</b>                       | 48                      | 31                         |
| <b>High</b>                           | 33                      | 25                         |
| <b>Chi-square Test Indep. P-value</b> | 0.716                   |                            |
